# Supplementary material for: Conductance and tunnelling current characteristics for individual identification of synthetic nucleic acids with a graphene device
Source: Royal Society of Chemistry journal article supplement (doi:10.1039/d2cp01255c), 2022-01-01
Supplement: d2cp01255c1.pdf [file d2cp01255c1.pdf]

*Supporting Information*

**Conductance and Tunnelling Current Characteristics for Individual  
Identification of Synthetic Nucleic Acids with Graphene Device**

Rameshwar L. Kumawat<sup>\*,1,2</sup> and Biswarup Pathak<sup>\*,1</sup>

<sup>1</sup>Department of Chemistry, Indian Institute of Technology (IIT) Indore, Indore, Madhya Pradesh, 453552, India

<sup>2</sup>Center for Computational Molecular Science and Technology, School of Chemistry and Biochemistry, and School of Computational Science and Engineering, Georgia Institute of Technology, Atlanta, Georgia 30332-0400, USA

\*E-mail: [rameshwarlall122@gmail.com](mailto:rameshwarlall122@gmail.com); [biswarup@iiti.ac.in](mailto:biswarup@iiti.ac.in)

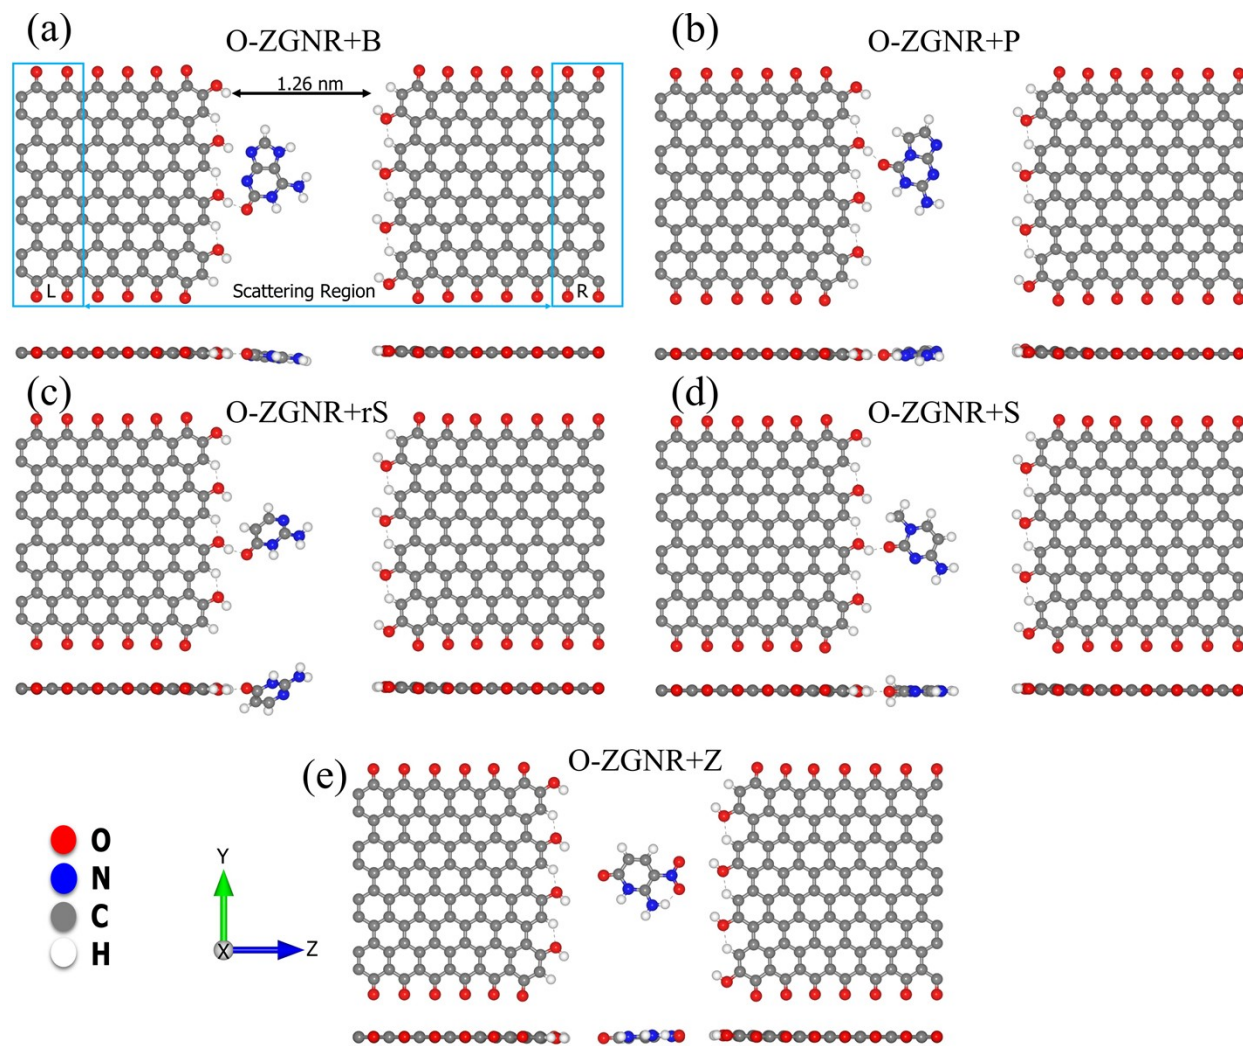

**Figure S1.** (a-e) Fully optimized atomic structures of O-ZGNR+Hachimoji nucleobases (B, P, rS, S, and Z) showing both nanoelectrodes (L and R) and a scattering (device) region. Here, Z-axis refers the transport direction.

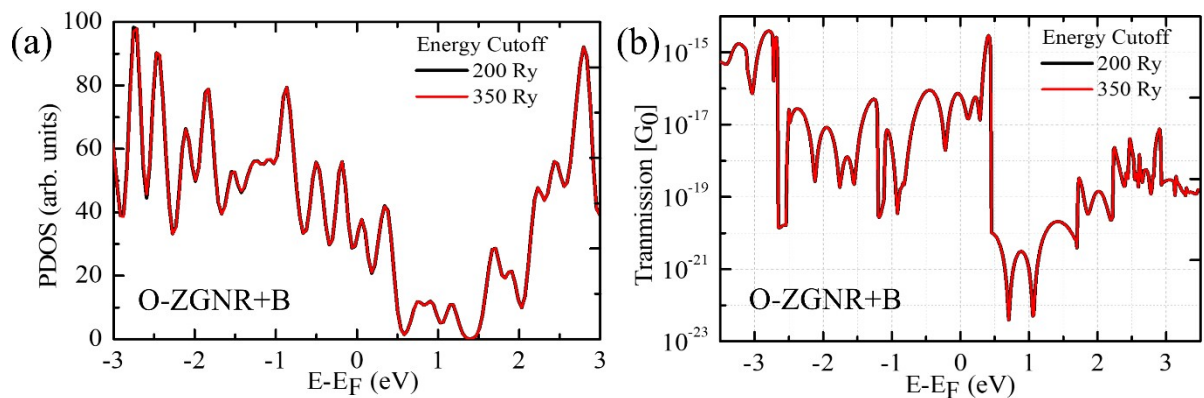

**Figure S2.** The density of States and Transmission function are computed at different energy cutoffs for the O-ZGNR+B system.

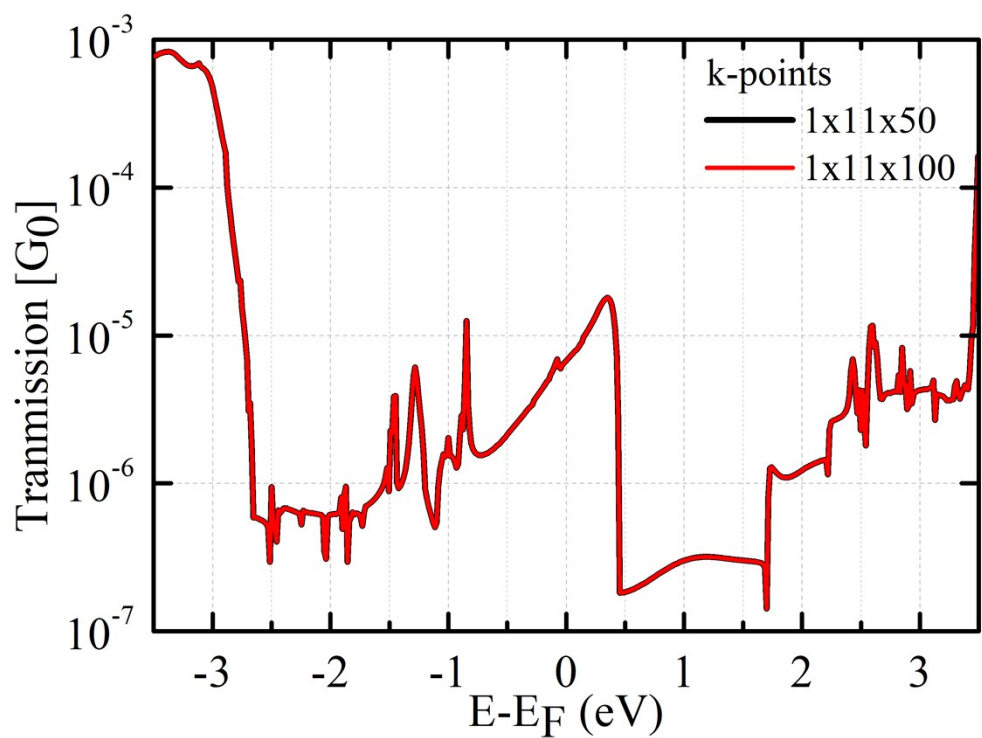

**Figure S3.** The transmission function for the O-ZGNR device calculated at different k-points.

### Scheme 1. Rotation of DNA Nucleobases inside the Nanogap:

We have considered the rotations of all the five DNA nucleobases around x-axis in the yz-plane from  $0^\circ$  to  $180^\circ$  in the steps of  $30^\circ$  as shown in **Figure S4-S8**. The relative energy values are tabulated in **Table S1**.

**Table S1.** Relative energies (in eV) of the O-ZGNR+nucleobase (nucleobase = B, P, rS, S, Z) system when nucleobases are rotated inside the nanogap at different angles from  $0^\circ$  to  $180^\circ$  in steps of  $30^\circ$ .

| Nucleobases | $0^\circ$ | $30^\circ$ | $60^\circ$ | $90^\circ$ | $120^\circ$ | $150^\circ$ | $180^\circ$ |
|-------------|-----------|------------|------------|------------|-------------|-------------|-------------|
| B           | 0.0       | 5.39       | 3.41       | 6.31       | 2.19        | 2.42        | 2.39        |
| P           | 0.0       | 0.21       | 1.02       | 1.59       | 3.55        | 1.91        | 0.15        |
| rS          | 0.0       | 2.26       | 0.39       | 0.54       | 0.89        | 1.01        | 1.10        |
| S           | 0.0       | 0.13       | 0.16       | 1.98       | 4.61        | 1.22        | 1.08        |
| Z           | 0.0       | 0.20       | 0.44       | 0.54       | 0.46        | 0.08        | 0.07        |

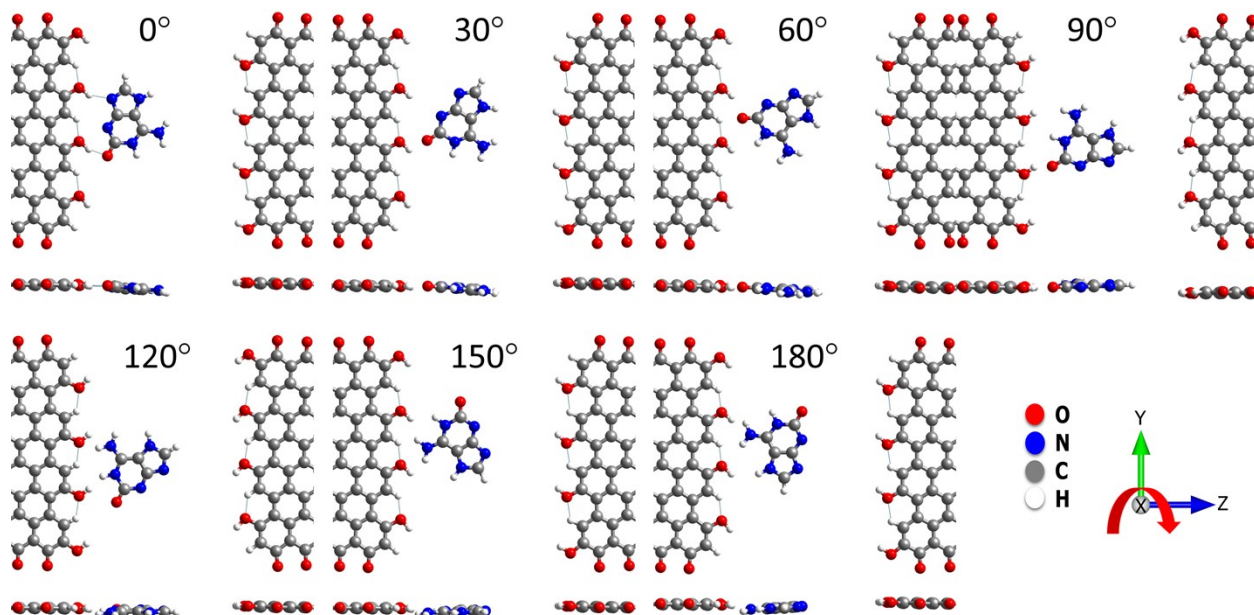

**Figure S4.** The representative orientations of fully optimized B nucleobase corresponding to rotations (from  $0^\circ$  to  $180^\circ$  in the steps of  $30^\circ$ ) are illustrated.

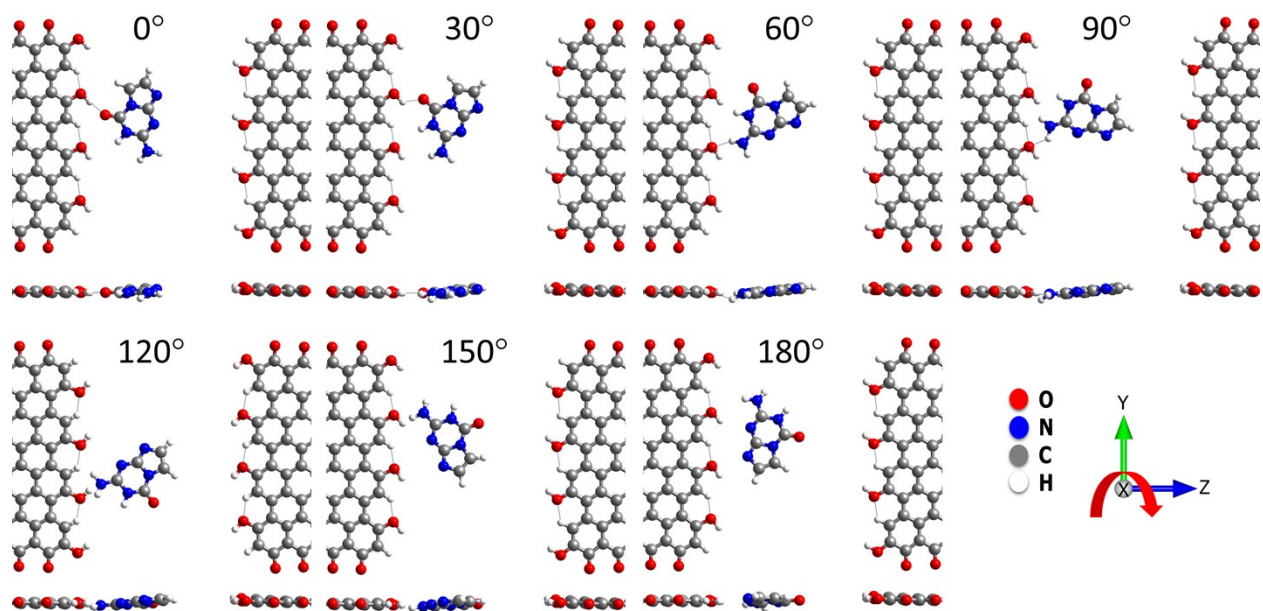

**Figure S5.** The representative orientations of fully optimized P nucleobase corresponding to rotations (from  $0^\circ$  to  $180^\circ$  in the steps of  $30^\circ$ ) are illustrated.

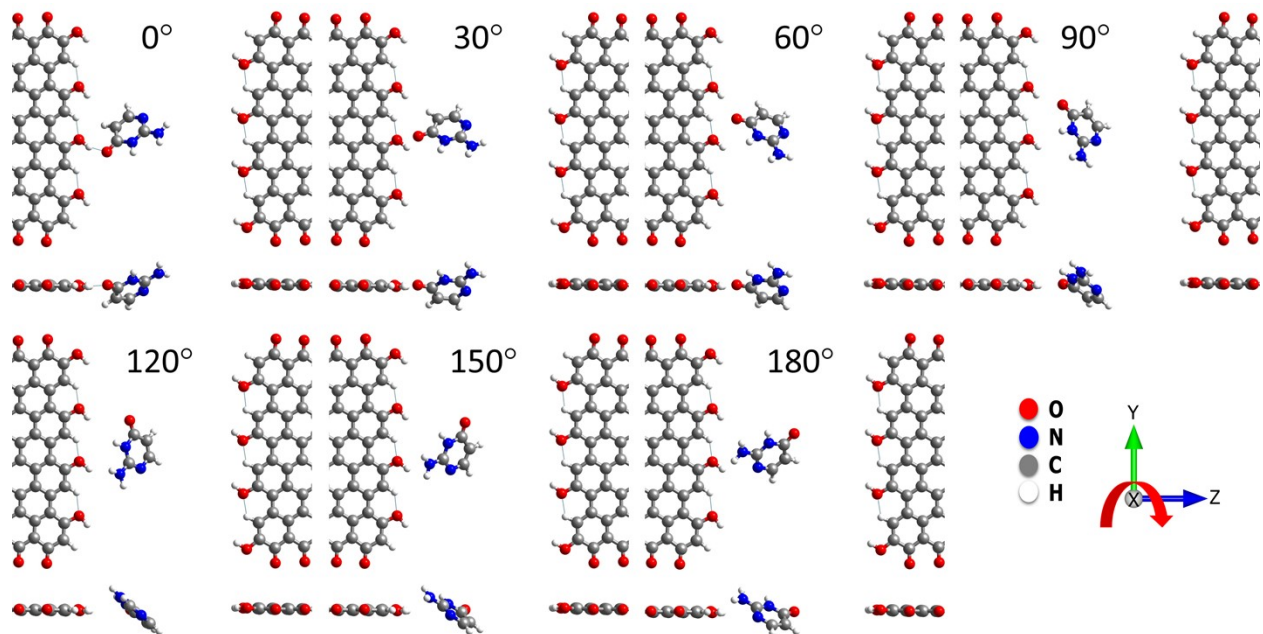

**Figure S6.** The representative orientations of fully optimized rS nucleobase corresponding to rotations (from  $0^\circ$  to  $180^\circ$  in the steps of  $30^\circ$ ) are illustrated.

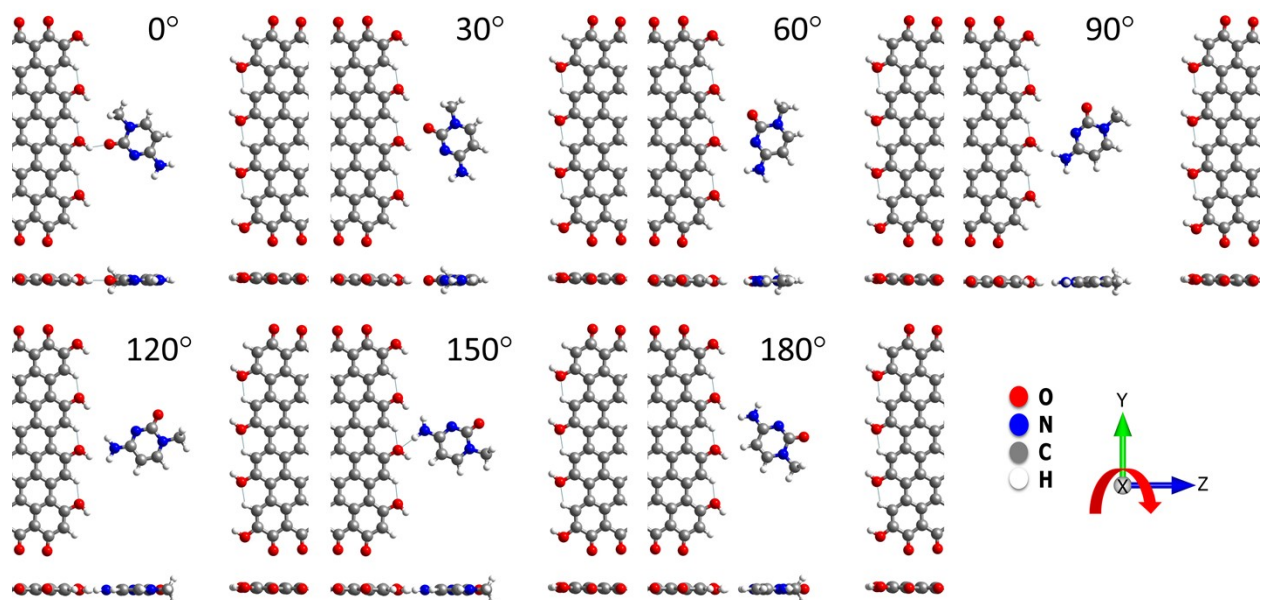

**Figure S7.** The representative orientations of fully optimized S nucleobase corresponding to rotations (from 0° to 180° in the steps of 30°) are illustrated.

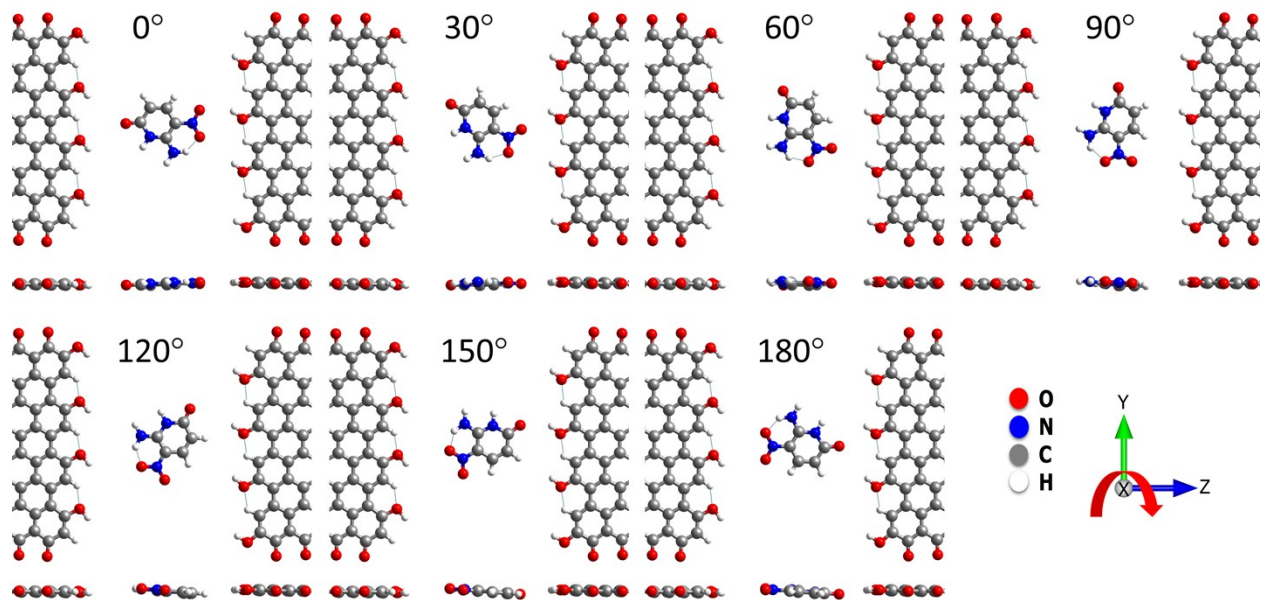

**Figure S8.** The representative orientations of fully optimized Z nucleobase corresponding to rotations (from 0° to 180° in the steps of 30°) are illustrated.

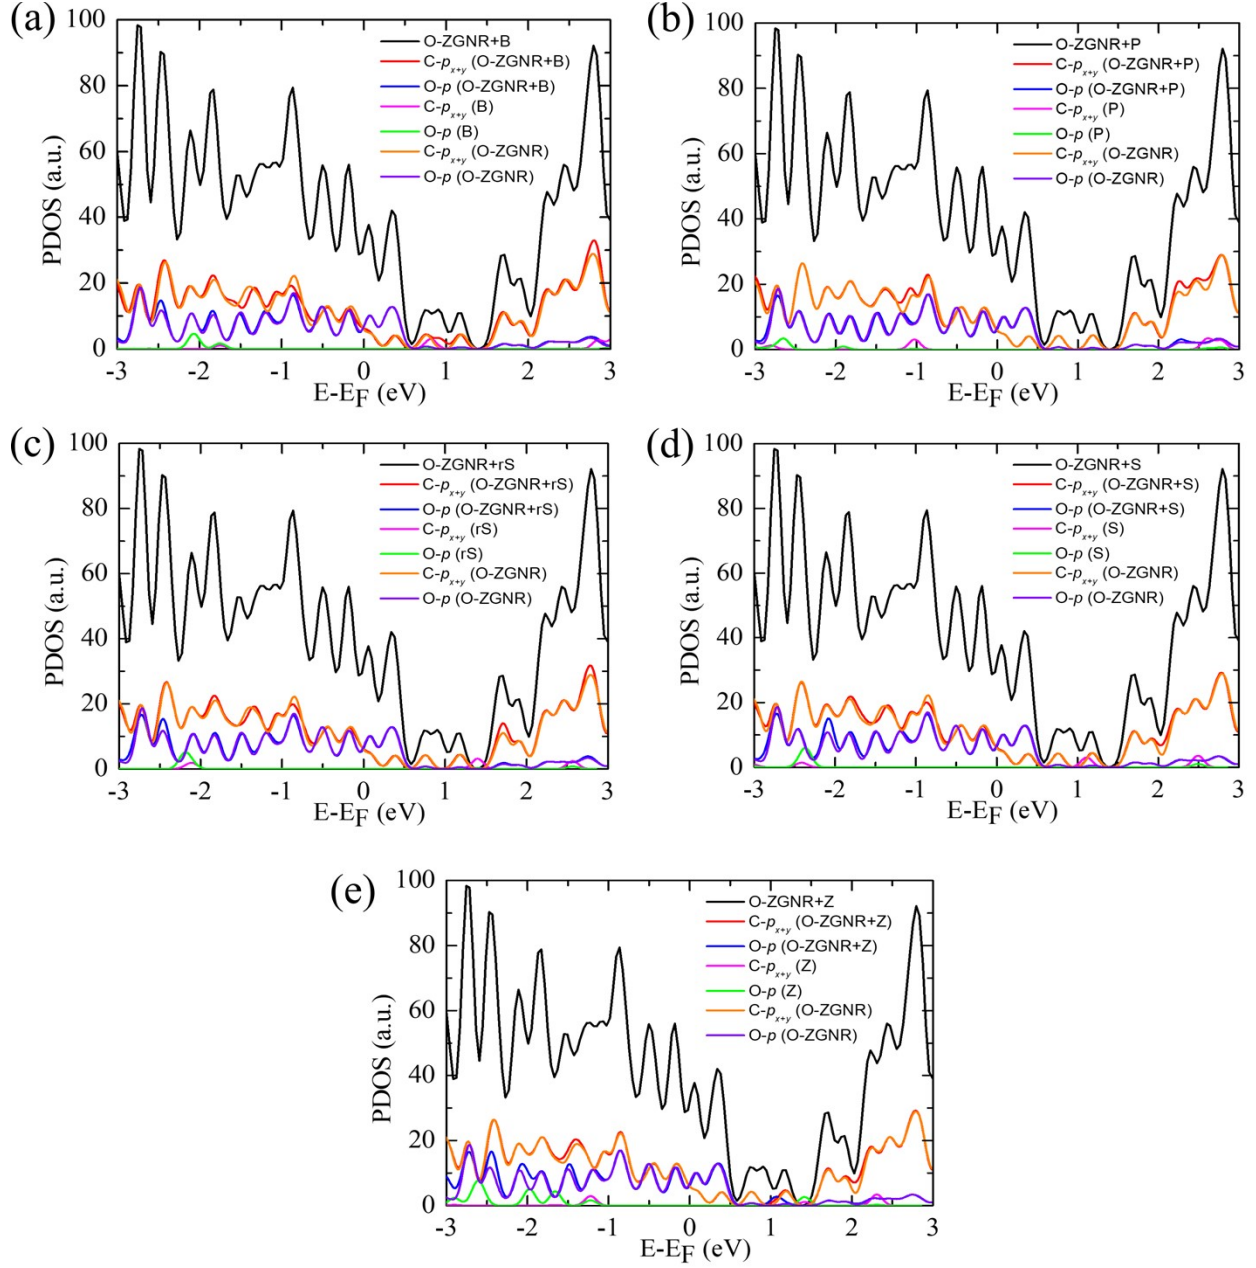

**Figure S9.** (a-e) Electronic DOS of the O-ZGNR+nucleobase (nucleobase: B, P, rS, S, and Z) and the PDOS of C- $p_{x+y}$  and O- $p$  of O-ZGNR, O-ZGNR+nucleobase and nucleobases. The Fermi level ( $E-E_F$ ) is set to zero.
